# Supplementary material for: New Co-Crystals/Salts of Gallic Acid and Substituted Pyridines: An Effect of Ortho-Substituents on the Formation of an Acid–Pyridine Heterosynthon
Source: MDPI journal article supplement (doi:10.3390/cryst12040497), 2022-04-03
Supplement: s1 [file s1]

Archive with 1 entries (1 files):
- crystals-1655335-supplementary.pdf
