# Supplementary material for: New Co-Crystals/Salts of Gallic Acid and Substituted Pyridines: An Effect of Ortho-Substituents on the Formation of an Acid–Pyridine Heterosynthon
Source: MDPI journal article supplement (doi:10.3390/cryst12040497), 2022-04-03
Supplement: s1 [file s1 › crystals-1655335-supplementary.pdf]

**Supporting Information for**  
**New co-crystals/salts of gallic acid and substituted pyridines: an effect of *ortho*-**  
**substituents on the formation of an acid-pyridine heterosynthon**

**Gleb L. Denisov,<sup>1,2</sup> Yulia V. Nelyubina<sup>1,2,\*</sup>**

<sup>1</sup> A.N. Nesmeyanov Institute of Organoelement Compounds, Russian Academy of Sciences,  
119991, Vavilova Str., 28, Moscow, Russia

<sup>2</sup> Bauman Moscow State Technical University, 105005, Baumanskaya Str., 5, Moscow, Russia

\* Correspondence: unelya@ineos.ac.ru

## Supplementary Figures:

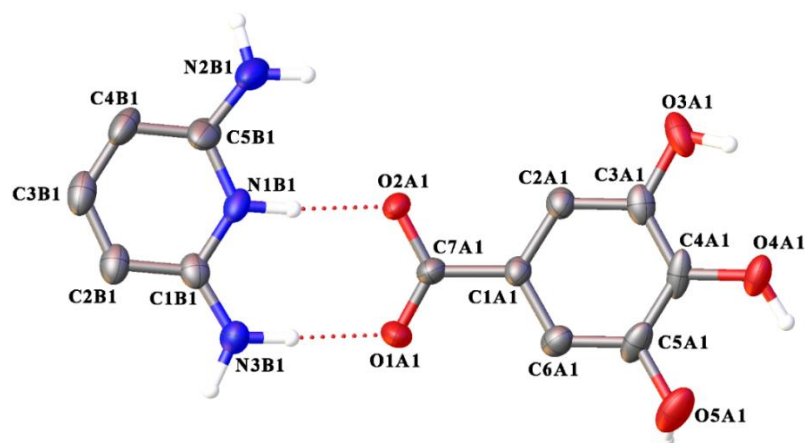

**Figure S1.** General view of the second symmetry-independent formula unit of the salt **4**. Hereinafter, non-hydrogen atoms are shown as thermal ellipsoids ( $p = 50\%$ ) and dashed lines stand for hydrogen bonds.

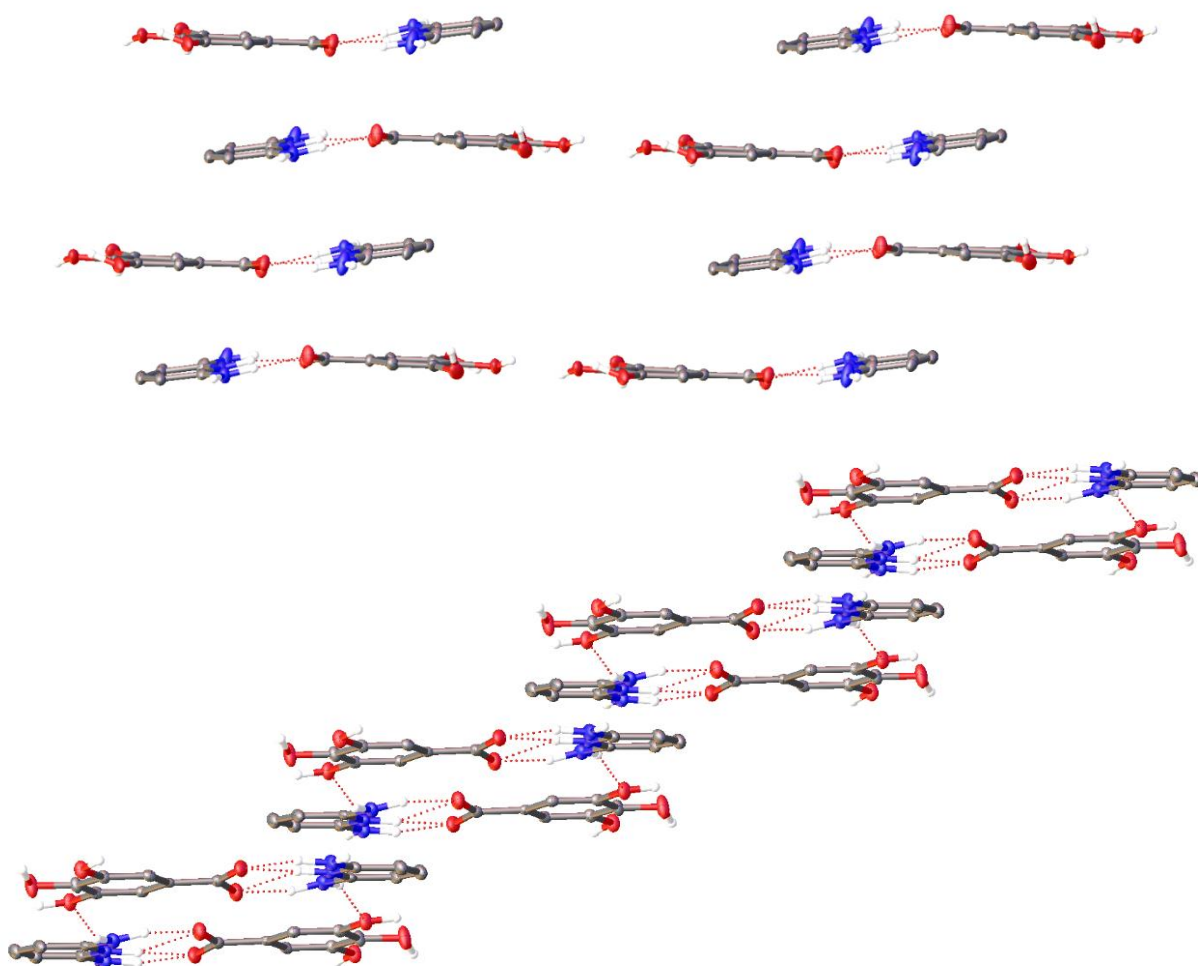

**Figure S2.** Fragments of the crystal packing in the salt **4** that are produced by the two-point (top) and the four-point (bottom) acid-pyridine heterosynths.

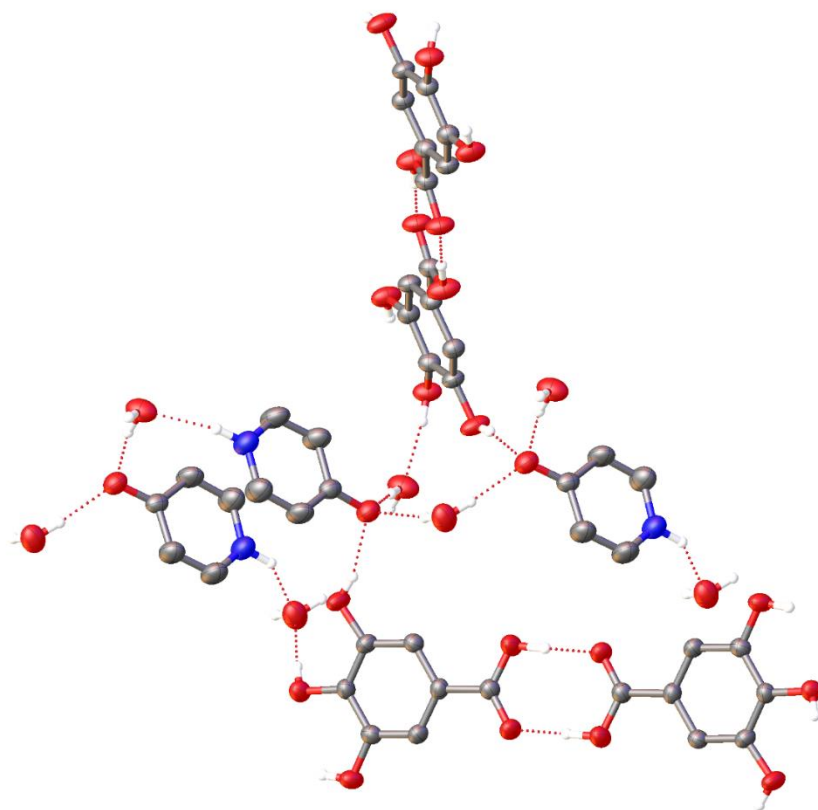

**Figure S3.** A fragment of the crystal packing in the co-crystal XUMHUL illustrating the formation of a centrosymmetric homosynthon from the molecules of gallic acid.

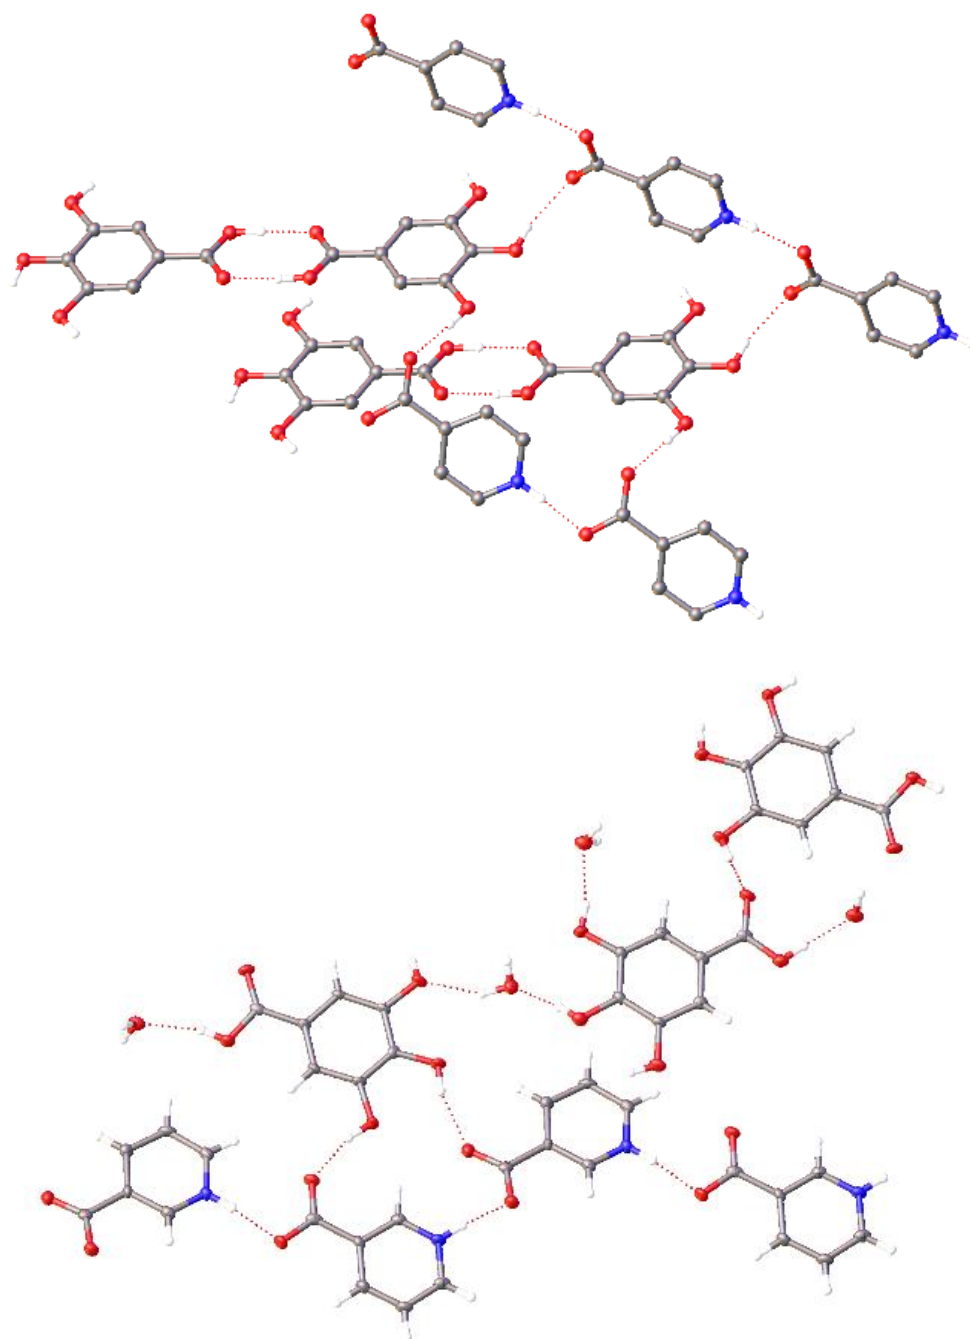

**Figure S4.** Fragments of the crystal packing in the co-crystals RUWGUM (top) and RUWHAT (bottom) illustrating the formation of hydrogen-bonded chains from the zwitterions of isonicotinic or nicotinic acid.

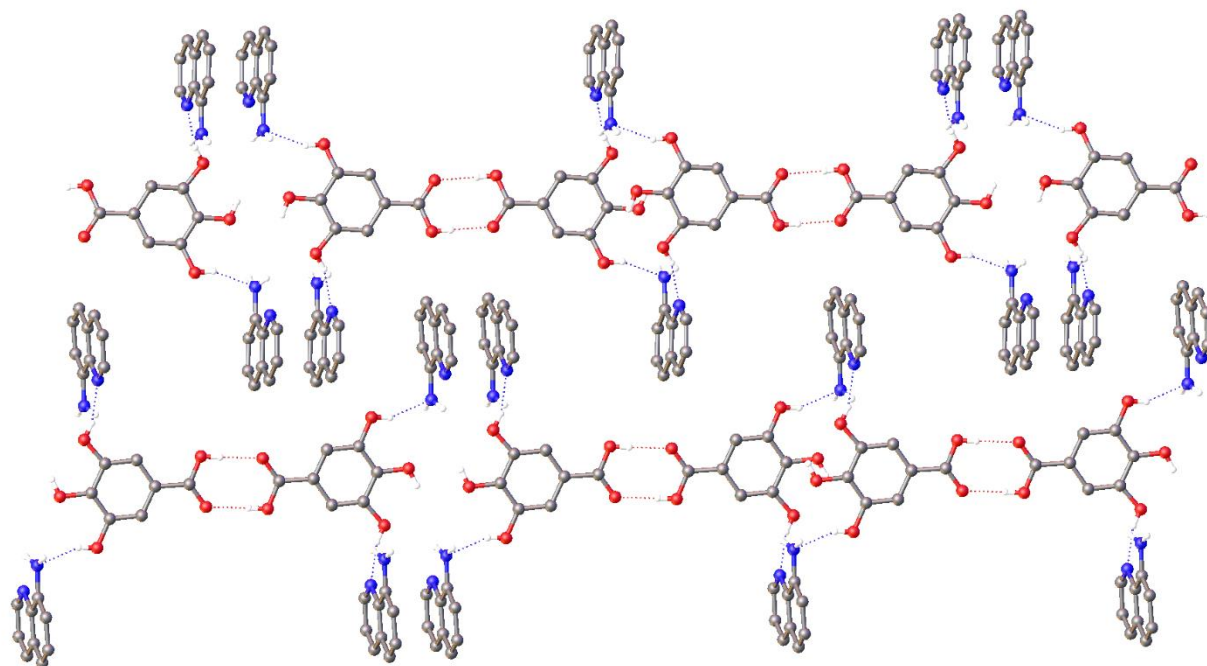

**Figure S5.** A fragment of the crystal packing in the salt AYIWEM illustrating the formation of hydrogen-bonded dimers from the molecules of gallic acid.

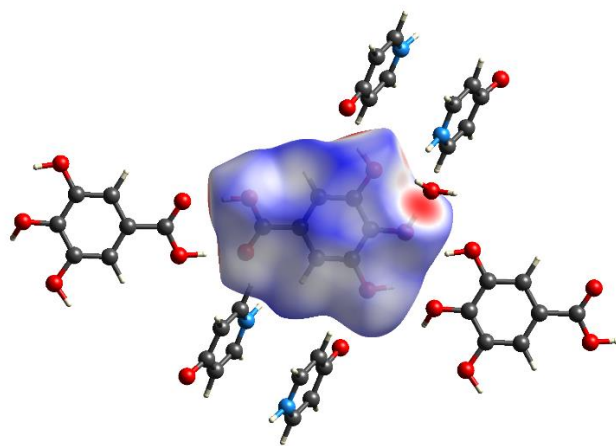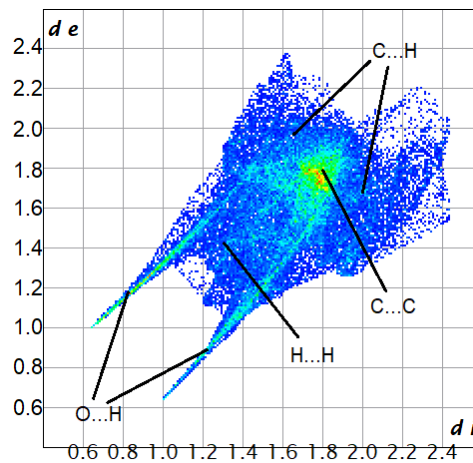

XUMHUL

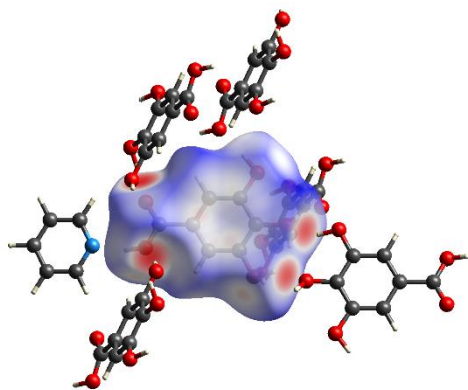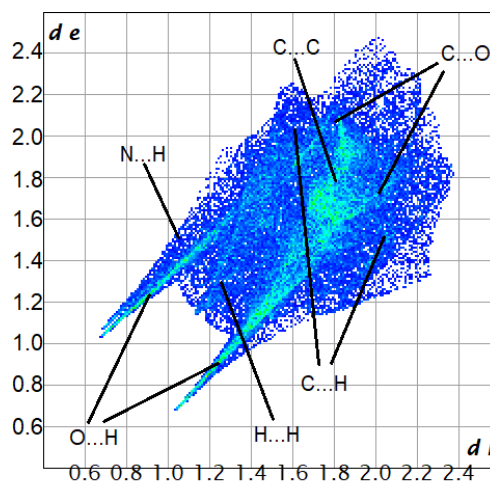

YAHTUY

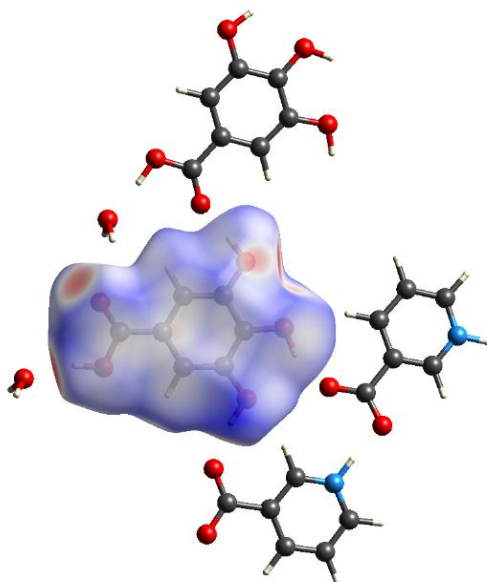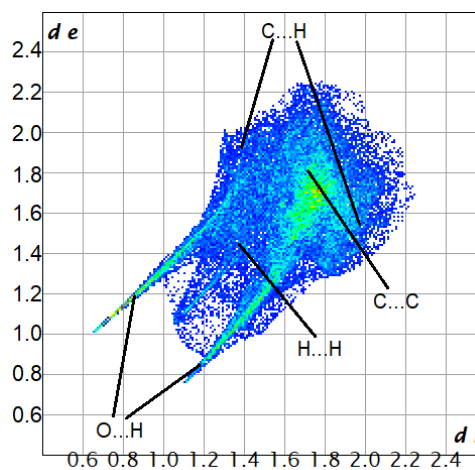

RUWHAT

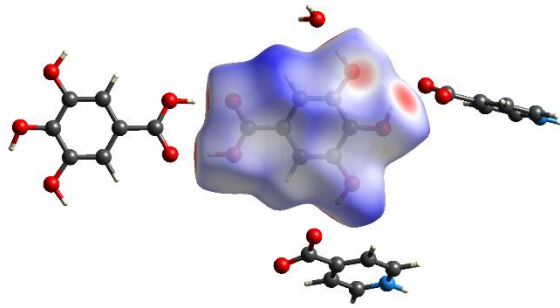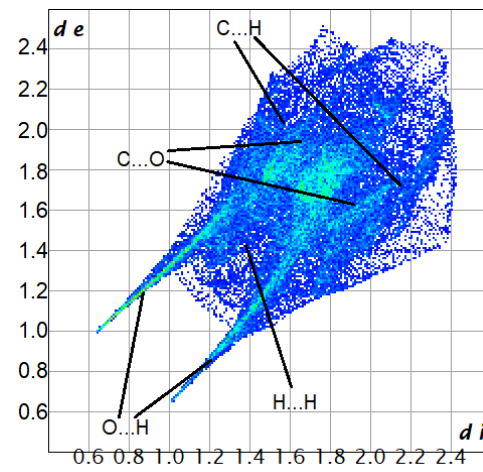

RUWGUM

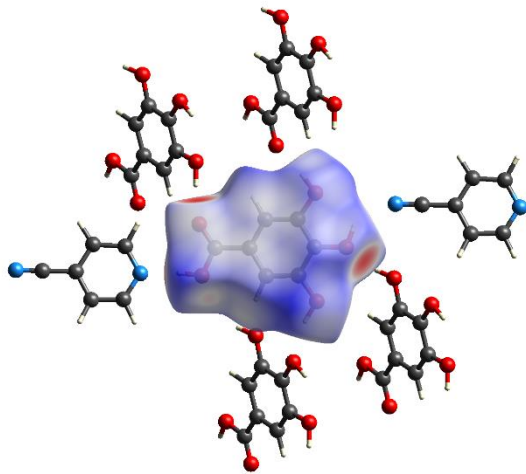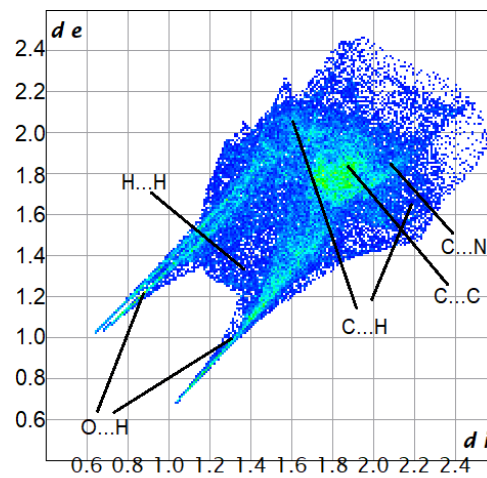

LALVED

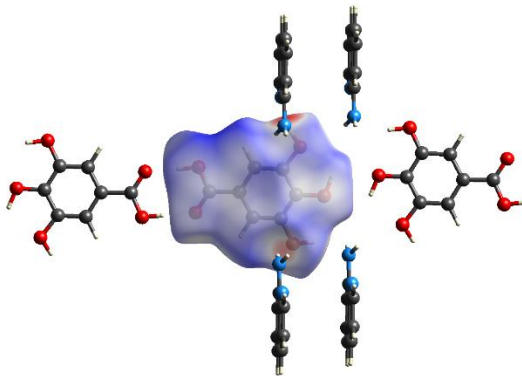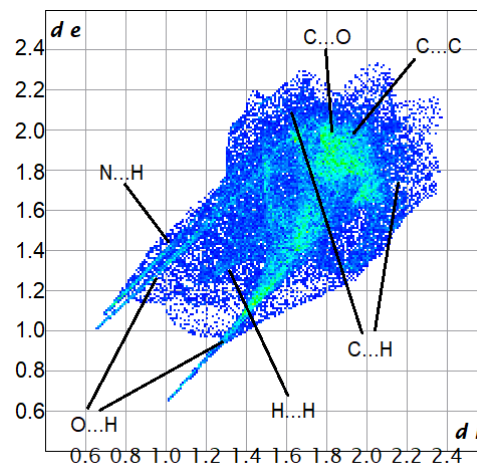

AYIWEM

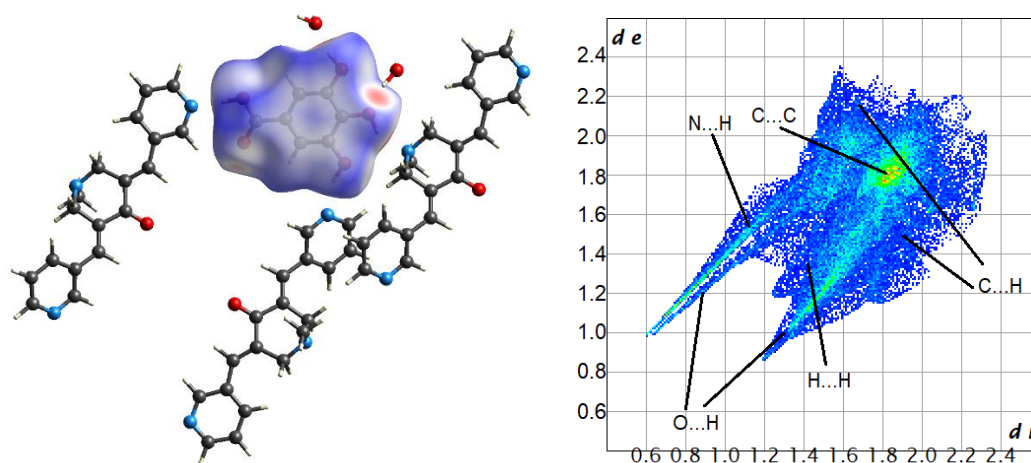

TUZFAX

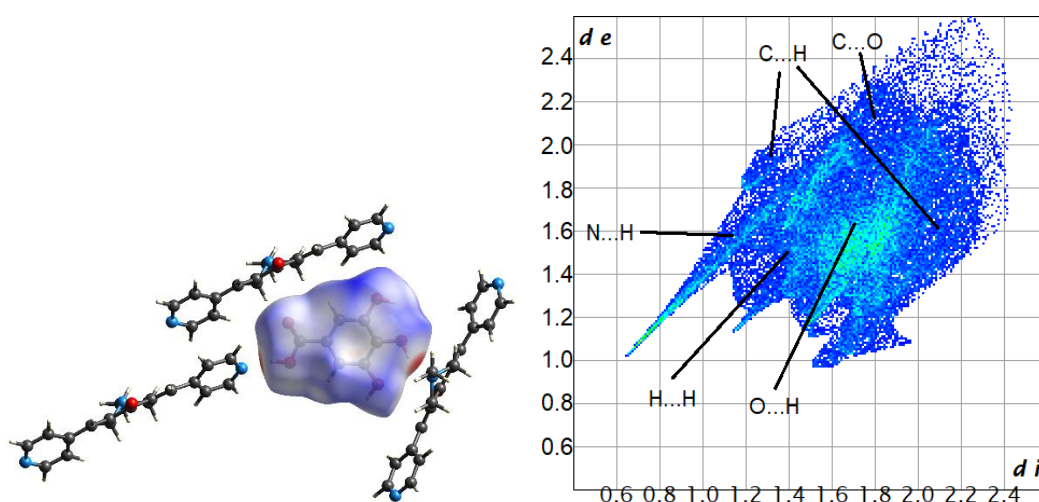

TUZFEB

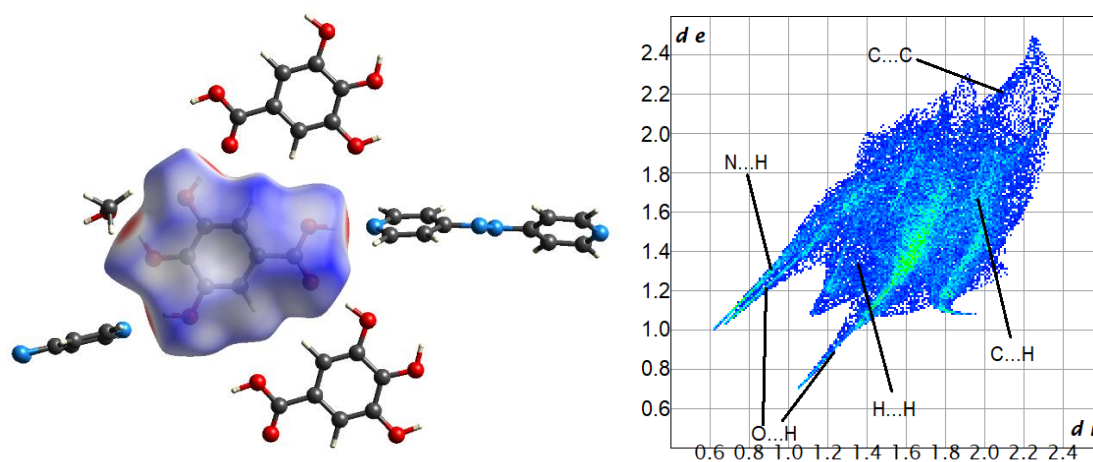

LEFPUJ

**Figure S6.** Hirshfeld surfaces (left) of the molecule of gallic acid and their 2D fingerprint plots (right), as generated by Crystal Explorer [1], in other co-crystals of gallic acid and pyridine-containing compounds from CSD identified by their RefCodes.

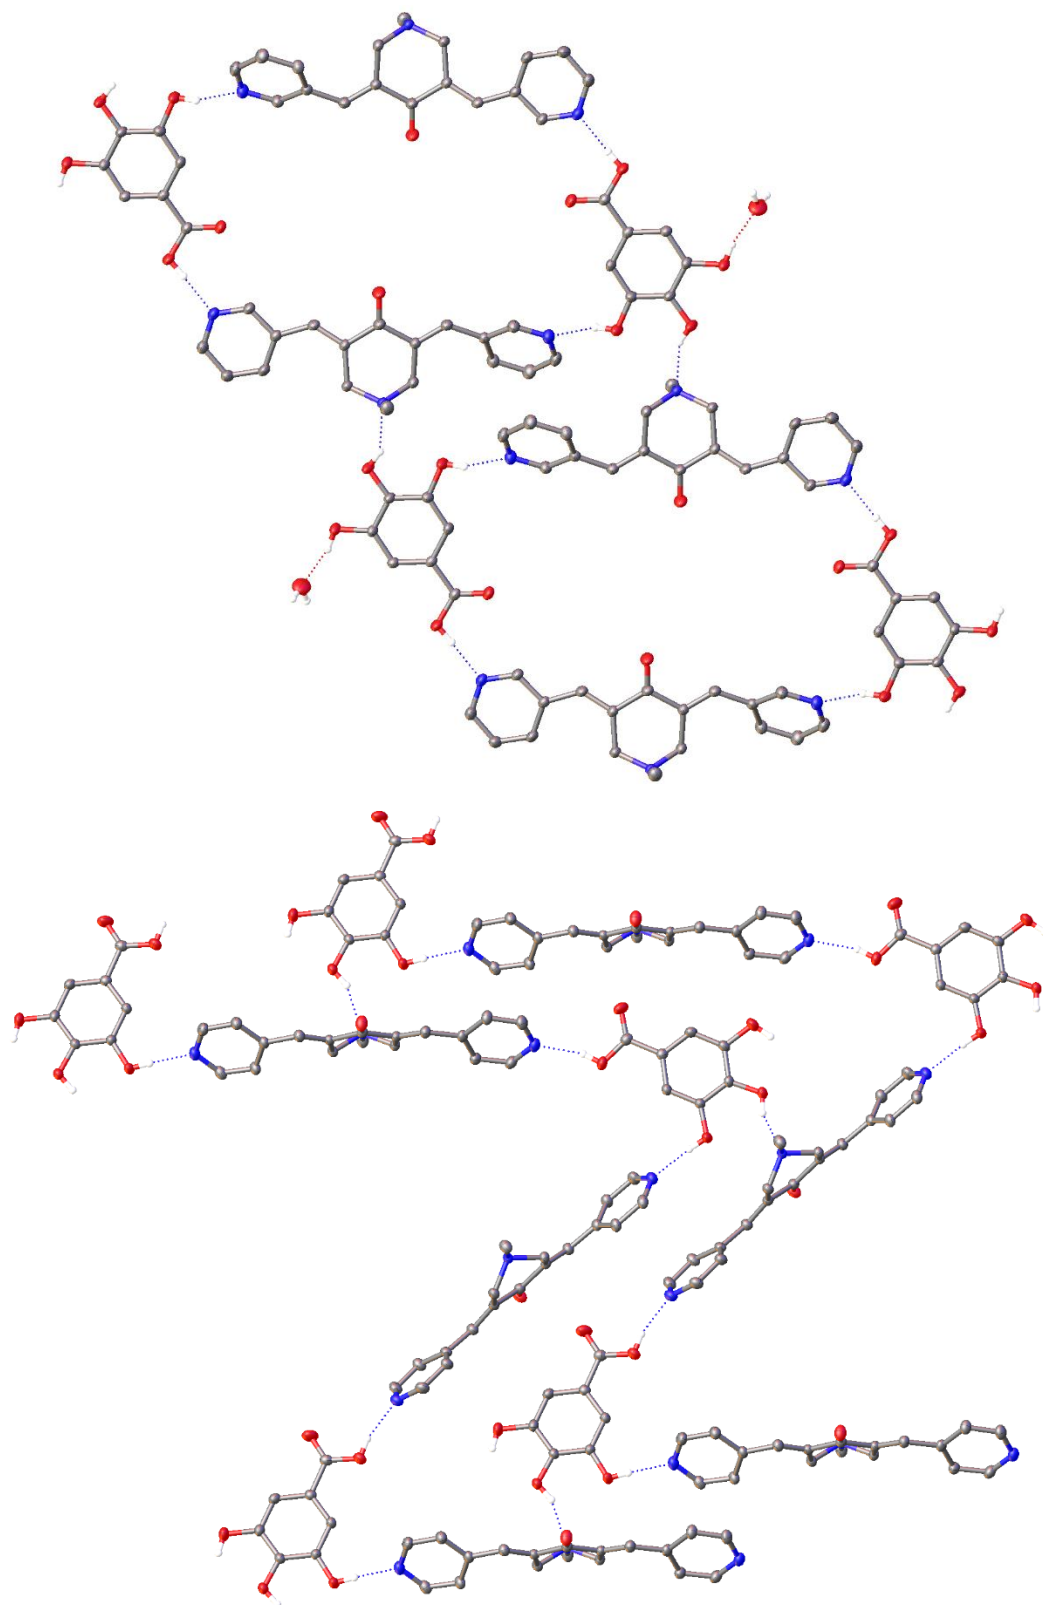

**Figure S7.** Fragments of the crystal packing in the co-crystals TUZFAX (top) and TUZFEB (bottom) illustrating the formation of hydrogen-bonded layers from the molecules of gallic acid and of an appropriate pyridine-containing compound.

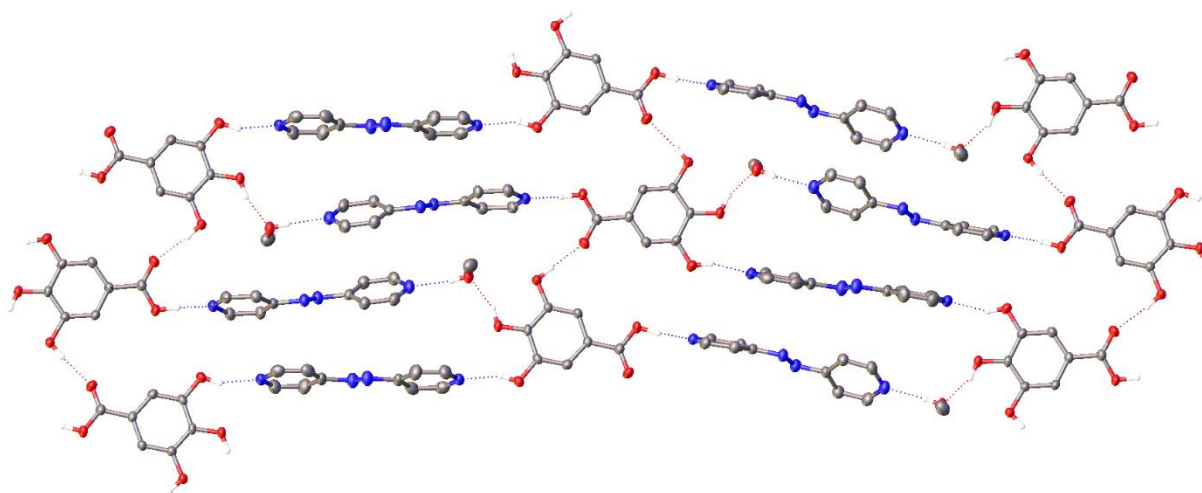

**Figure S8.** A fragment of the crystal packing in the co-crystal LEFPUJ illustrating the formation of hydrogen-bonded layers with the alternating chains of the molecules of gallic acid and of 1,2-bis(pyridin-4-yl)diazene.

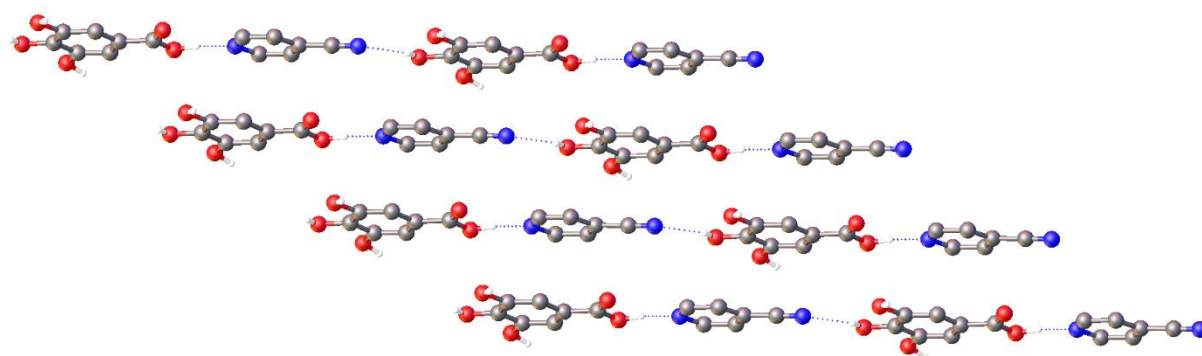

**Figure S9.** A fragment of the crystal packing in the co-crystal LALVED illustrating the formation of hydrogen-bonded chains from the molecules of gallic acid and 4-cyanopyridine.

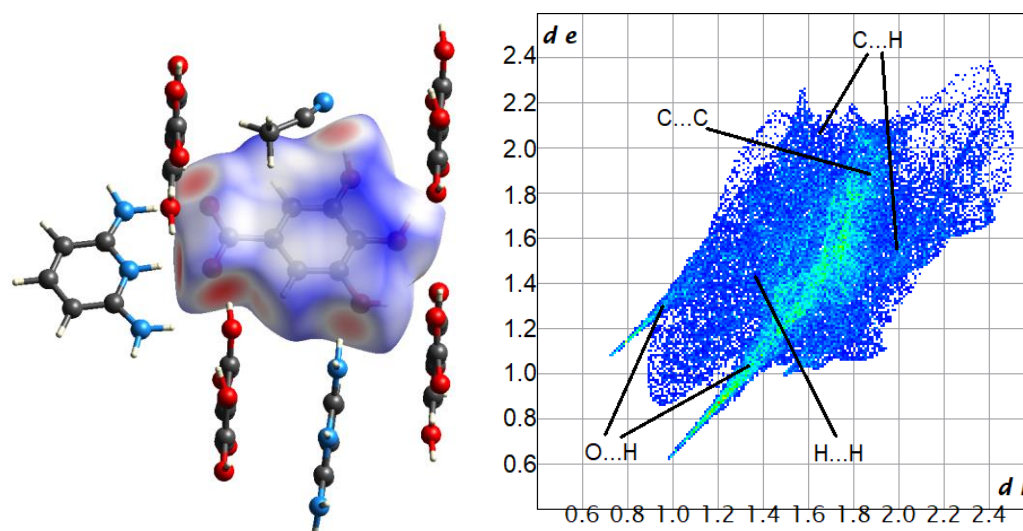

**Figure S10.** Hirshfeld surface (left) of the second symmetry-independent gallate anion in the salt **4** and its 2D fingerprint plot (right).

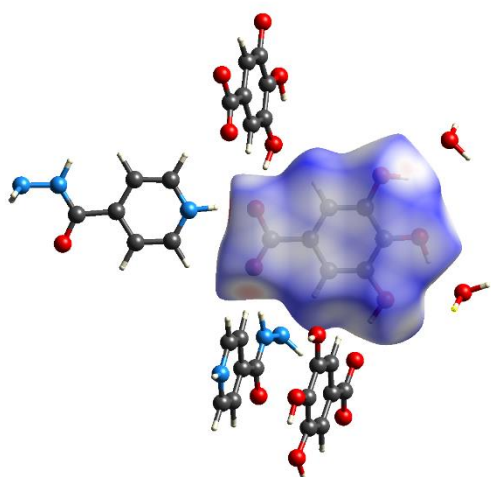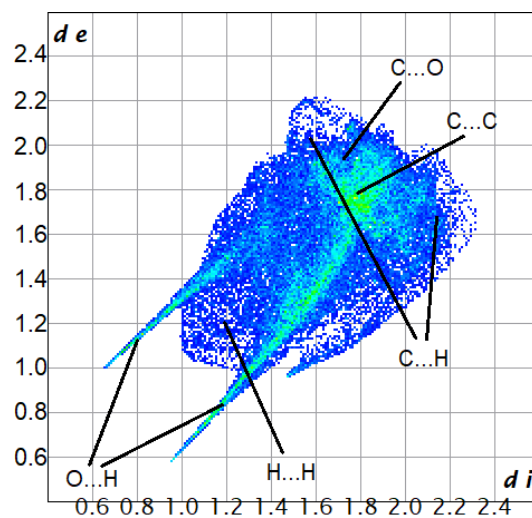

XUMKAU

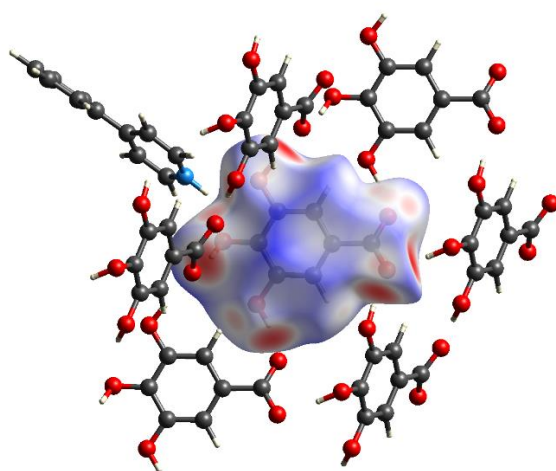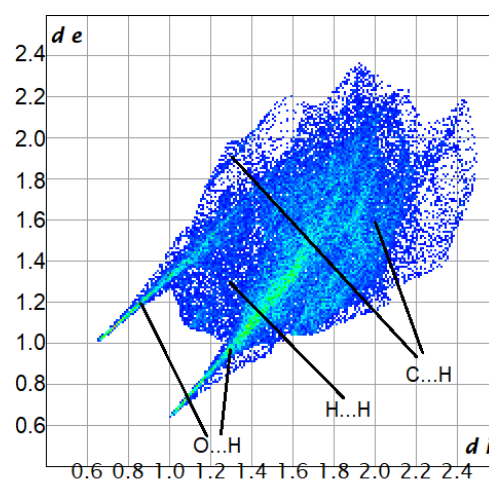

TICZIQ

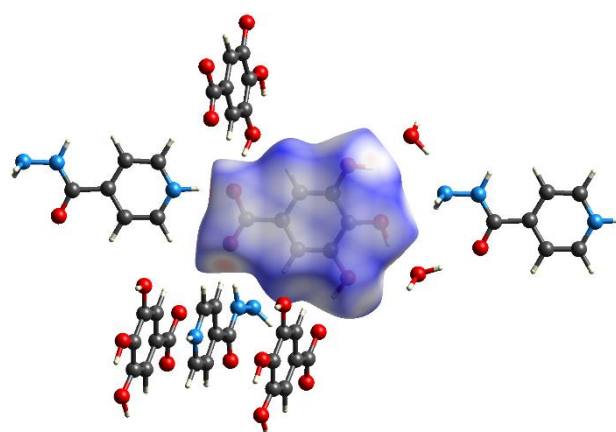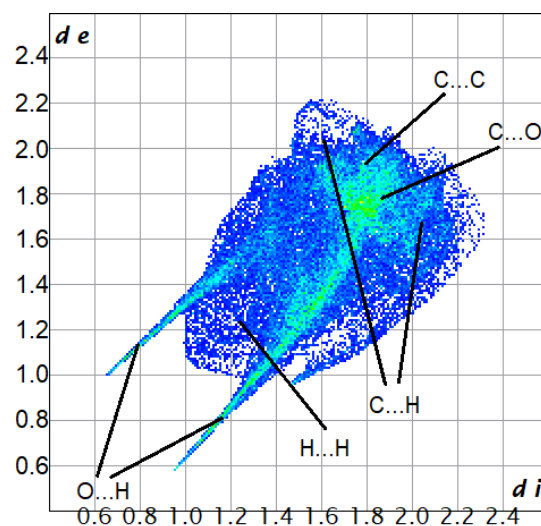

LODHIX

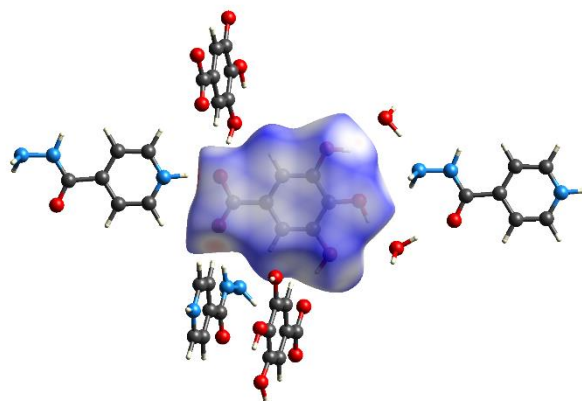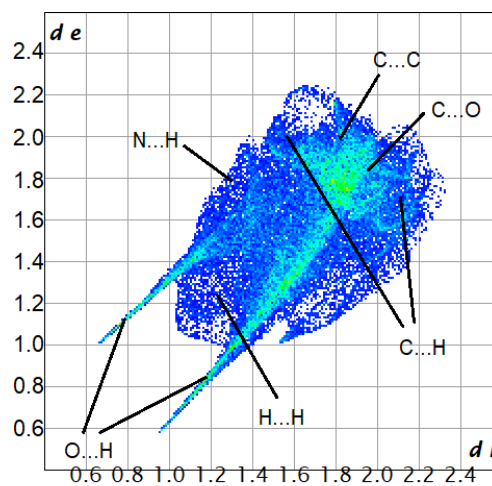

LODHOD

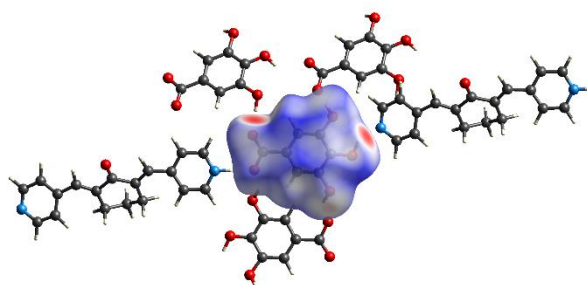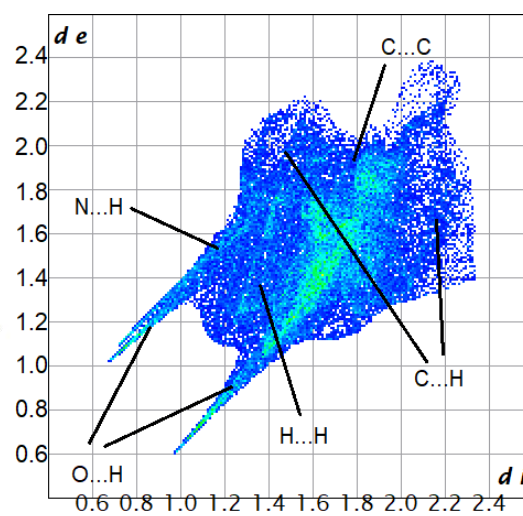

TUZDUP

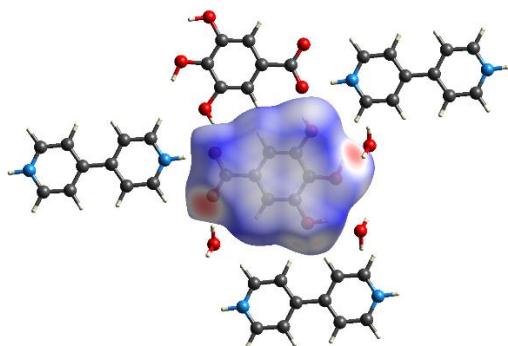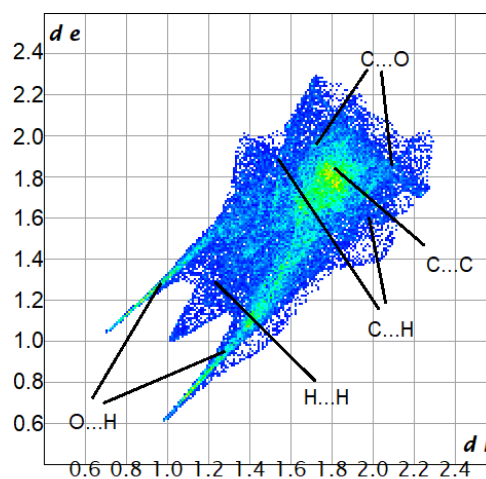

EHUGOE

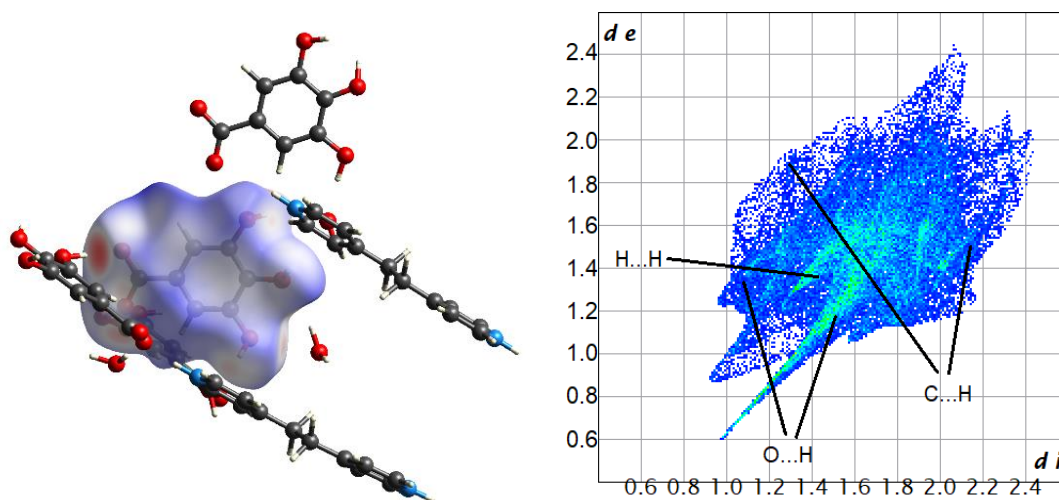

DUTJET

**Figure S11.** Hirshfeld surfaces (left) of the gallate anion and their 2D fingerprint plots (right) in other salts of gallic acid and pyridine-containing compounds from CSD identified by their RefCodes. X-ray diffraction data for LODHIX and LODHOD are collected from the same salt at 100 K and at room temperature, respectively.

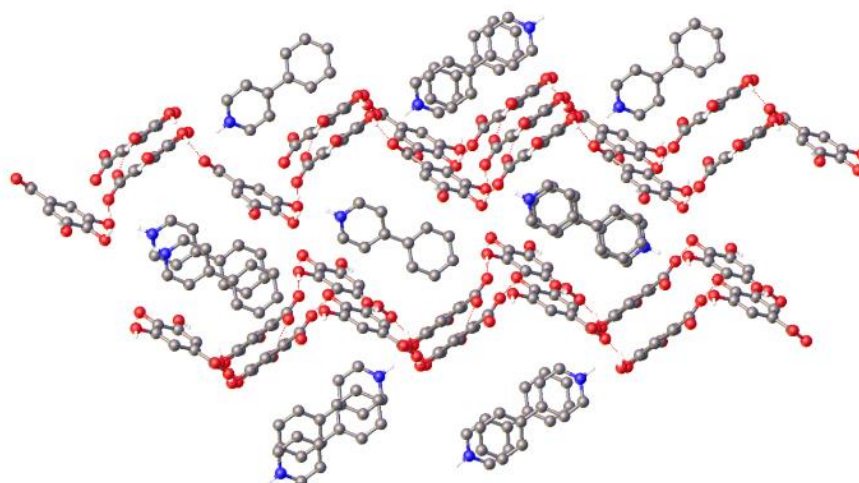

**Figure S12.** A fragment of the crystal packing in the salt TICZIQ illustrating the formation of hydrogen-bonded corrugated layers from the gallate anions.

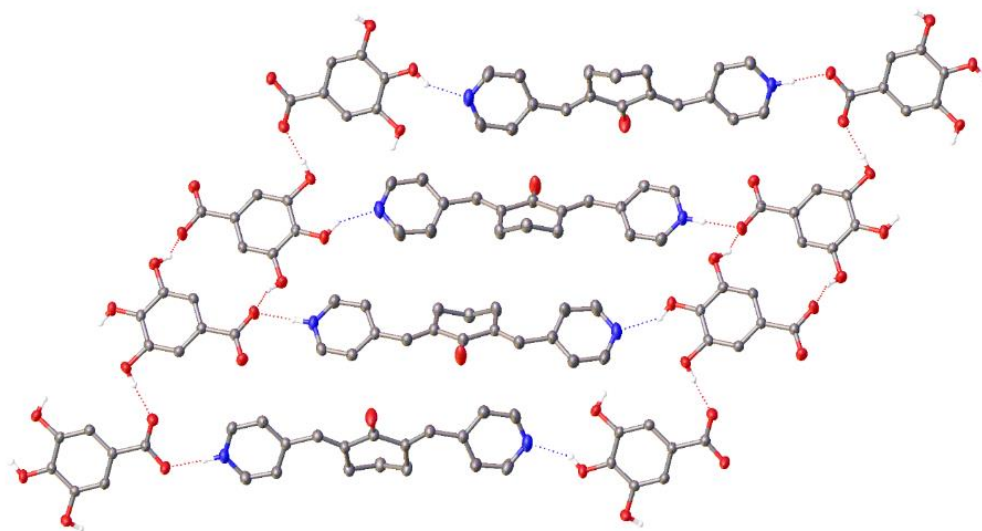

**Figure S13.** A fragment of the crystal packing in the co-crystal TUZDUP illustrating the formation of hydrogen-bonded layers.

**Supplementary Schemes:**

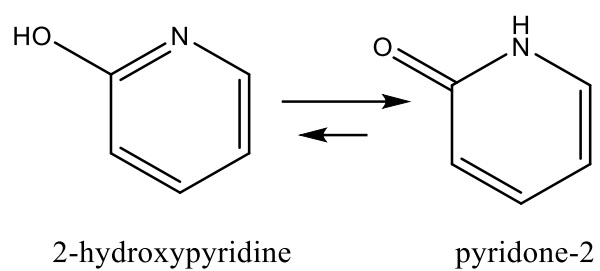

**Scheme S1.** Keto-enol equilibrium of **2-OH-Py** favoring its keto-form, pyridone-2.

**Supplementary Tables:****Table S1.** Contributions (%) of various interactions into the Hirschfeld surface of the molecule of gallic acid in other co-crystals of gallic acid identified by their RefCodes in CSD.

| Contacts | XUMHUL | YAHTUY | RUWHAT* | RUWGUM | LALVED | AYIWEM | TUZFAX | TUZFEB | LEFPUJ | Average |
|----------|--------|--------|---------|--------|--------|--------|--------|--------|--------|---------|
| O...H    | 44.8   | 40.2   | 42.9    | 43.5   | 40.3   | 34.7   | 37.6   | 30.7   | 38.6   | 39.3    |
| N...H    | 0.0    | 4.2    | 0.6     | 0.3    | 9.1    | 4.5    | 9.5    | 9.8    | 7.3    | 5.0     |
| C...H    | 12.9   | 14.2   | 15.3    | 17.5   | 11.9   | 10.6   | 11.8   | 20.9   | 18.5   | 14.8    |
| H...H    | 27.6   | 29.6   | 24.4    | 22.8   | 19.6   | 32.7   | 27.4   | 33.1   | 30.6   | 27.5    |
| C...C    | 6.2    | 4.4    | 5.4     | 2.9    | 8.0    | 6.0    | 9.7    | 0.8    | 0.4    | 4.9     |
| O...O    | 2.4    | 2.3    | 1.4     | 3.4    | 2.9    | 1.8    | 0.4    | 0.0    | 0.4    | 1.7     |
| C...N    | 0.0    | 0.2    | 0.5     | 0.5    | 3.8    | 0.0    | 0.8    | 0.0    | 1.2    | 0.8     |
| C...O    | 6.0    | 4.3    | 9.2     | 8.6    | 4.0    | 9.8    | 1.9    | 4.6    | 0.6    | 5.4     |
| N...O    | 0.0    | 0.5    | 0.4     | 0.4    | 0.4    | 0.0    | 0.9    | 0.1    | 2.6    | 0.6     |

\*For systems with several symmetry-independent molecules of gallic acid, the mean values are given.

**Table S2.** The parameters of the hydrogen bond O-H...N in the heterosynthon acid-pyridine in the co-crystals of gallic acid identified by their RefCodes in CSD.

| Compound | N...O, Å | NHO, °     |
|----------|----------|------------|
| XUMHUL   | -        | -          |
| YAHTUY   | 2.730(5) | 168.8(2)   |
| RUWGUM   | -        | -          |
| RUWHAT   | -        | -          |
| LALVED   | 2.636(2) | 171(4)     |
| AYIWEM   | -        | -          |
| TUZFAX   | 2.587(2) | 177.24(11) |
| TUZFEB   | 2.691(2) | 163.45(10) |
| LEFPUJ   | 2.623(3) | 174(2)     |
| Average  | 2.653    | 170.9      |

**Table S3.** The parameters of the hydrogen bond N-H...O in the heterosynthon acid-pyridine in the gallate salts identified by their RefCodes in CSD.

| Compound         | N...O, Å             | NHO, °               |
|------------------|----------------------|----------------------|
| <b>XUMKAU</b>    | 2.642(3)             | 179(2)               |
| <b>TICZIQ</b>    | 2.9421(19)           | 122(3)               |
| <b>LODHIX*</b>   | 2.544(4) (2.576(4))  | 173(4) (173(4))      |
| <b>LODHOD*</b>   | 2.551(5) (2.564(5))  | 172(6) (177(7))      |
| <b>TUZDUP</b>    | 2.5997(18)           | 177.6(4)             |
| <b>EHUGOE</b>    | 2.6134(15)           | 179(2)               |
| <b>DUTJEI*</b>   | 2.571(5) (2.514(6))  | 162.9(3) (166.4(3))  |
| <b>Average**</b> | <b>2.612 [2.575]</b> | <b>168.2 [173.3]</b> |

\*The values for the second symmetry-independent gallate anion are given in parentheses.

\*\*The value in the brackets is an average with TICZIQ excluded, as it features an unfavorable geometry of the hydrogen bond with the two components of the acid-pyridine heterosynthon twisted relative to each other (Fig. S12 of SI).

**Table S4.** The parameters of the hydrogen bond N-H...O in the heterosynthon acid-pyridine in the co-crystals **1**, **2** and **3** and in the salts **4** and **5** together with the appropriate average values.

| Compound       | N...O, Å                            | NHO, °                                |
|----------------|-------------------------------------|---------------------------------------|
| <b>1</b>       | 2.941(8)                            | 154.7(2)                              |
| <b>2</b>       | 2.798(2)                            | 175.82(9)                             |
| <b>3</b>       | 2.739(2)                            | 160.73(17)                            |
| <b>Average</b> | <b>2.826</b>                        | <b>163.75</b>                         |
| <b>4*</b>      | 3.002(5) and 3.009(5)<br>(2.766(4)) | 143.74(18) and 150.4(2)<br>(165.0(2)) |
| <b>5</b>       | 3.034(2)                            | 124.28(11)                            |
| <b>Average</b> | <b>2.950</b>                        | <b>145.9</b>                          |

\*The values for the second symmetry-independent gallate anion are given in parentheses.

**Table S5.** Contributions (%) of various interactions into the Hirschfeld surface of the gallate anion in other gallate salts identified by their RefCodes in CSD.

| Contacts | <b>XUMKAU</b> | <b>TICZIQ*</b> | <b>LODHIX*</b> | <b>LODHOD*</b> | <b>TUZDUP</b> | <b>EHUGOE</b> | <b>DUTJEI*</b> | <b>Average</b> |
|----------|---------------|----------------|----------------|----------------|---------------|---------------|----------------|----------------|
| O...H    | 45.8          | 54.5           | 45.6           | 46.7           | 44.2          | 46.2          | 50.7           | 47.7           |
| N...H    | 0.6           | 0.0            | 0.7            | 0.7            | 3.1           | 0.4           | 0.0            | 0.8            |
| C...H    | 12.7          | 19.0           | 10.3           | 8.3            | 15.9          | 6.8           | 15.3           | 12.6           |
| H...H    | 25.8          | 24.8           | 26.3           | 26.9           | 25.0          | 26.0          | 25.4           | 25.7           |
| C...C    | 5.2           | 0.0            | 8.1            | 10.4           | 6.2           | 13.3          | 4.6            | 6.8            |
| O...O    | 2.9           | 0.1            | 1.9            | 0.9            | 0.7           | 1.3           | 2.0            | 1.4            |
| C...N    | 1.5           | 0.1            | 1.1            | 0.8            | 0.5           | 0.5           | 0.8            | 0.8            |
| C...O    | 6.6           | 1.7            | 5.5            | 4.4            | 2.6           | 5.3           | 1.0            | 3.9            |
| N...O    | 0.2           | 0.1            | 0.7            | 1.1            | 1.7           | 0.3           | 0.3            | 0.6            |

\*For systems with several symmetry-independent gallate anions, the mean values of interactions are given. X-ray diffraction data for LODHIX and LODHOD are collected from the same salt at 100 K and at room temperature, respectively.

**Table S6.**  $\Delta pK_a$  values for **1-5** and for other two-component systems based on gallic acid identified by their RefCodes in CSD.\*

| Compound                                          |                                | pKa*  | $\Delta pK_a$ | Predicted                             | Experimental                                                                     |
|---------------------------------------------------|--------------------------------|-------|---------------|---------------------------------------|----------------------------------------------------------------------------------|
| GA                                                | -                              | 4.33  |               | -                                     | -                                                                                |
|                                                   | <b>2-OH-Py**</b>               | 12.02 | 7.69          | Salt                                  | Co-crystals (from acetonitrile kept for six days and four weeks, respectively)   |
|                                                   | <b>2,6-NH<sub>2</sub>-Py</b>   | 6.13  | 1.8           | Both co-crystal and salt are possible | Salt (from acetonitrile kept for six days)                                       |
|                                                   | <b>2,6-CH<sub>2</sub>OH-Py</b> | 13.03 | 8.7           | Salt                                  | Salt (from acetonitrile kept for three weeks)                                    |
|                                                   | <b>2-COOH-quinoline</b>        | 1.2   | -3.13         | Co-crystal                            | Co-crystal (from methanol kept for ten days)                                     |
| <b>XUMHUL</b><br>[10.1016/j.molstruc.2020.127828] |                                |       | 0.86          | Both co-crystal and salt are possible | Co-crystal (from methanol and kept for 4-5 days)                                 |
| <b>YAHTUY</b><br>[10.1107/S1600536811043868]      |                                |       | 0.9           | Both co-crystal and salt are possible | Co-crystal                                                                       |
| <b>RUWHAT</b><br>[10.1021/cg100484a]              |                                |       | -2.13         | Co-crystal                            | Co-crystal (from methanol kept for three days at RT)                             |
| <b>RUWGUM</b><br>[10.1021/cg100484a]              |                                |       | -2.38         | Co-crystal                            | Co-crystal (from water-methanol (1:3) kept for seven days at RT)                 |
| <b>LALVED</b><br>[10.1016/j.molstruc.2020.129279] |                                |       | -2.41         | Co-crystal                            | Co-crystal (from water-methanol (1:1) refluxed for 1 h and kept overnight at RT) |
| <b>AYIWEM</b><br>[10.5517/ccdc.csd.ccx8q84]       |                                |       | -0.24         | Both co-crystal and salt are possible | Co-crystal                                                                       |
| <b>TUZFAX</b><br>[10.1016/j.molstruc.2016.02.025] |                                |       | -0.45         | Both co-crystal and salt are possible | Co-crystal (from CH <sub>2</sub> Cl <sub>2</sub> -methanol)                      |

|                                                                     |       |                                       |                                                                                                         |
|---------------------------------------------------------------------|-------|---------------------------------------|---------------------------------------------------------------------------------------------------------|
|                                                                     |       |                                       | (1:1) kept for nine days at RT)                                                                         |
| <b>TUZFEB</b><br>[ <a href="#">10.1016/j.molstruc.2016.02.025</a> ] | -0.45 | Both co-crystal and salt are possible | Co-crystal (from CH <sub>2</sub> Cl <sub>2</sub> -methanol (1:1) kept for seven days at RT)             |
| <b>LEFPUJ</b><br>[ <a href="#">10.1107/S1600536812031029</a> ]      | -2.4  | Co-crystal                            | Co-crystal (from methanol kept for weeks at RT)                                                         |
| <b>XUMKAU</b><br>[10.1016/j.molstruc.2020.127828]                   | 4.82  | Salt                                  | Salt (from methanol kept for 4-5 days)                                                                  |
| <b>TICZIQ</b><br>[10.1039/C3CE40499D]                               | 1.12  | Both co-crystal and salt are possible | Salt (from methanol)                                                                                    |
| <b>LODHIX</b><br>[ <a href="#">10.1021/cg4018807</a> ]              | 7.07  | Salt                                  | Salt (from methanol-water)                                                                              |
| <b>LODHOD</b><br>[10.1080/15421406.2013.763335]                     | 7.07  | Salt                                  | Co-crystal (from ethanol-water)                                                                         |
| <b>TUZDUP</b><br>[ <a href="#">10.1016/j.molstruc.2016.02.025</a> ] | -0.8  | Both co-crystal and salt are possible | A salt and a co-crystal (from CH <sub>2</sub> Cl <sub>2</sub> -methanol (1:1) kept for five days at RT) |
| <b>EHUGOE</b><br>[10.1524/ncrs.2010.0308]                           | -1.06 | Both co-crystal and salt are possible | Salt (from water-ethanol (1:2) kept at pH = 6-7 for six days at RT)                                     |
| <b>DUTJEI</b><br>[ <a href="#">10.1107/S1600536810027169</a> ]      | -2.4  | Co-crystal                            | Salt (from ethanol-water (2:1), refluxed for 30 min and kept for one week at RT)                        |

\*pKa values are taken as-is from Sci-Finder database (Calculated using Advanced Chemistry Development (ACD/Labs) Software V11.02).

\*\*In the solid state, **2-OH-Py** exists only as the keto-tautomer [2; 3].

### Supplementary References:

1. CrystalExplorer: a program for Hirshfeld surface analysis, visualization and quantitative analysis of molecular crystals / P.R. Spackman [et al.] // Journal of Applied Crystallography. – 2021. – Vol. 54. – CrystalExplorer. – № 3. – P. 1006-1011.
2. Yang H.W. Charge Density Study of 2-Pyridone / H.W. Yang, B.M. Craven // Acta Crystallographica Section B: Structural Science. – 1998. – Vol. 54. – № 6. – P. 912-920.
3. NMR J(C,C) scalar coupling analysis of the effects of substituents on the keto–enol tautomeric equilibrium in 2-OH-n-X-pyridines. An experimental and DFT study / D.G. De Kowalewski [и др.] // Molecular Physics. – 2004. – Т. 102. – № 23-24. – С. 2607-2615.
